# Supplementary material
Source: PubMed Central journal article supplement (PMC7216440)
Supplement: ONCO-25-e861-s001.pdf [file ONCO-25-e861-s001.pdf]

Supplemental Tables for:  
Etiology and prognosis of pneumonia in patients with solid tumors: a prospective cohort of hospitalized cases  
Ana Fernández-Cruz et al.

**Table S1.**

| <b>Test</b>                                          | <b>Performed</b>                                     | <b>Diagnostic yield</b> |
|------------------------------------------------------|------------------------------------------------------|-------------------------|
|                                                      | <b>(n, % out of 132 episodes)(n, % of performed)</b> |                         |
| Urinary antigens                                     | 89 (67.4)                                            | 12 (13.5)               |
| Sputum Gram stain and culture                        | 59 (44.7)                                            | 14 (23.7)               |
| Fungal biomarkers                                    | 17 (12.9)                                            | 4 (23.5)                |
| BAL                                                  | 7 (5.3)                                              | 3 (28.6)                |
| Blood culture                                        | 102 (78.0)                                           | 8 (7.8)                 |
| <i>Staphylococcus aureus</i> nasal swab              | 64 (49)                                              | 0                       |
| Virus nasal swab                                     | 63 (47.7)                                            | 6 (9.5)                 |
| Sputum fungal stain and fungal culture               | 7 (5.3)                                              | 0                       |
| <i>Pneumocystis jiroveci</i> stain in induced sputum | 6 (4.5)                                              | 1 (16.7)                |
| Sputum mycobacterial stain and culture               | 7 (5.3)                                              | 0                       |
| CMV antigen or PCR in blood                          | 5 (3.8)                                              | 1 (20)                  |

BAL: Bronchoalveolar lavage; CMV: Cytomegalovirus; PCR: polymerase chain reaction.

**Table S2.** Differences between episodes according to ICU admission.

|                                                    | <b>Total<br/>(n:132,<br/>%)</b> | <b>Non-ICU<br/>admission<br/>(, %)</b> | <b>ICU<br/>admission<br/>(, %)</b> | <b>p</b>     |
|----------------------------------------------------|---------------------------------|----------------------------------------|------------------------------------|--------------|
| <b>Characteristics of cancer</b>                   |                                 |                                        |                                    |              |
| Type of tumor<br>(lung vs other)                   | 42 (31.8)                       | 35 (30.4)                              | 7 (41.2)                           | 0.409        |
| Tumor stage<br>(metastatic vs other)               | 102<br>(77.3)                   | 91 (79.1)                              | 11 (64.7)                          | 0.217        |
| Terminal                                           | 31 (23.5)                       | 31 (27.0)                              | 0 (0)                              | <b>0.012</b> |
| Presence of lung involvement                       | 73 (55.3)                       | 65 (56.5)                              | 8 (47.1)                           | 0.602        |
| Recent chemotherapy<br>(previous month)            | 89 (67.9)                       | 77 (67.5)                              | 12 (70.6)                          | 0.999        |
| Therapy (cytostatics vs other)                     | 84 (63.3)                       | 73 (63.5)                              | 11 (64.7)                          | 0.999        |
| <b>Clinical characteristics</b>                    |                                 |                                        |                                    |              |
| Sex (men)                                          | 97 (73.5)                       | 87 (75.7)                              | 10 (58.8)                          | 0.151        |
| Age, mean (SD)                                     | 65.7<br>(12.9)                  | 65.9 (13.4)                            | 63.9 (9.5)                         | 0.558        |
| Age-adjusted Charlson (mean, SD)                   | 8.5 (2.3)                       | 8.5 (2.3)                              | 8.2 (2.5)                          | 0.689        |
| PS status (0-1)                                    | 63 (50.8)                       | 52 (48.6)                              | 11 (64.7)                          | 0.298        |
| Place of acquisition<br>(hospital vs other)        | 42 (31.8)                       | 36 (31.3)                              | 6 (35.3)                           | 0.783        |
| Vaccinated against influenza                       | 53 (40.5)                       | 49 (43.0)                              | 4 (23.5)                           | 0.185        |
| Vaccinated against <i>Streptococcus pneumoniae</i> | 48 (36.9)                       | 46 (40.7)                              | 2 (11.8)                           | <b>0.029</b> |

|                               |                |             |             |              |
|-------------------------------|----------------|-------------|-------------|--------------|
| Hypoxemia at presentation     | 75 (56.8)      | 61 (53.0)   | 14 (82.4)   | <b>0.034</b> |
| Fever at presentation         | 76 (57.6)      | 67 (58.3)   | 9 (52.9)    | 0.754        |
| BP, mean (SD)                 | 90.4<br>(16.9) | 90.5 (17.1) | 89.5 (16.4) | 0.823        |
| Creatinine, mean (SD)         | 0.8 (0.5)      | 0.8 (0.5)   | 0.9 (0.7)   | 0.325        |
| Bilirubin, mean (SD)          | 0.67<br>(0.8)  | 0.6 (0.8)   | 0.9 (0.7)   | 0.243        |
| Neutropenia <1000 ANC         | 13 (9.8)       | (6.1)       | 6 (35.3)    | <b>0.002</b> |
| Neutropenia <500 ANC          | 9 (6.8)        | 5 (4.3)     | 4 (23.5)    | <b>0.016</b> |
| Corticosteroids               | 42 (31.8)      | 37 (32.2)   | 5 (29.4)    | 0.999        |
| Influenza                     | 5 (3.8)        | 4 (3.5)     | 1 (5.9)     | 0.999        |
| Recurrent episode             | 15 (11.4)      | 13 (11.3)   | 2 (11.8)    | 0.999        |
| <b>Radiology</b>              |                |             |             |              |
| Interstitial infiltrate       | 12 (20.3)      | 9 (7.8)     | 3 (17.6)    | 0.186        |
| Lobar infiltrate              | 110<br>(90.2)  | 96 (89.7)   | 14 (93.3)   | 0.999        |
| Pleural effusion              | 40 (55.6)      | 32 (51.6)   | 8 (80)      | 0.169        |
| Nodules                       | 8 (14)         | 8 (15.4)    | 0 (0)       | 0.999        |
| Obstructive pneumonia         | 9 (6.8)        | 9 (.8)      | 0 (0)       | 0.604        |
| <b>Diagnosis</b>              |                |             |             |              |
| Bronchoscopy                  | 7 (5.3)        | 6 (5.2)     | 1 (5.9)     | 0.999        |
| Etiological diagnosis         | 48 (36.6)      | 40 (34.8)   | 8 (47.1)    | 0.419        |
| <b>Management and outcome</b> |                |             |             |              |

|                                                                                                |                |             |             |               |
|------------------------------------------------------------------------------------------------|----------------|-------------|-------------|---------------|
| Antimicrobial PDD, mean (SD)                                                                   | 20.3<br>(52.1) | 20.9 (55.6) | 16.7 (12.8) | 0.758         |
| Appropriate empirical antimicrobials according to etiology <sup>a</sup>                        | 35 (77.8)      | 31 (83.8)   | 4 (50)      | 0.059         |
| Appropriate empirical antimicrobials according to local guideline (all)                        | 60 (45.8)      | 53 (88.3)   | 7 (11.7)    | 0.797         |
| Appropriate empirical antimicrobials according to local guideline if if no etiologic diagnosis | 34 (41)        | 31 (91.2)   | 3 (8.8)     | 0.731         |
| ID consultation                                                                                | 34<br>(25.8%)  | 27 (23.5)   | 7 (41.2)    | 0.141         |
| Vasoactive drugs                                                                               | 5 (3.8)        | 1 (0.9)     | 4 (23.5)    | <b>0.001</b>  |
| NIMV                                                                                           | 14 (10.6)      | 1 (0.9)     | 13 (76.5)   | <b>0.0001</b> |
| 10-day mortality                                                                               | 33 (24.2)      | 21 (18.3)   | 11 (64.7)   | <b>0.0001</b> |
| 30-day mortality                                                                               | 61 (46.2)      | 47 (40.9)   | 14 (82.4)   | <b>0.002</b>  |

<sup>a</sup>Evaluated only in 48 episodes with etiological diagnosis

BAL: Broncho-alveolar lavage; ICU: Intensive care unit; ID: Infectious diseases; MDR: Multidrug-resistant; MV: Mechanical ventilation; NIMV: Non-invasive mechanical ventilation; PDD: Prescribed daily dose; PS: Performance status; SD: Standard deviation

**Table S3.** Characteristics of pneumonia in hospitalized cancer patients and risk factors for 10-day and 30-day mortality (only first episode per patient).

|                                                           | Total<br>(n, %) | Survivors<br>10 d<br>(100,<br>75.8%) | Non-<br>survivors<br>10 d<br>(32,<br>24.2%) | p             | Survivors<br>30 d<br>(71,<br>53.8%) | Non-<br>survivors<br>30 d<br>(61,<br>46.2%) | p             |
|-----------------------------------------------------------|-----------------|--------------------------------------|---------------------------------------------|---------------|-------------------------------------|---------------------------------------------|---------------|
| <b>Characteristics of cancer</b>                          |                 |                                      |                                             |               |                                     |                                             |               |
| <b>Type of tumor (lung vs other)</b>                      | 34<br>(29.1)    | 26 (28.6)                            | 8 (30.8)                                    | 0.811         | 22 (32.8)                           | 12 (24.0)                                   | 0.313         |
| <b>Tumor stage (metastatic vs other)</b>                  | 93<br>(79.5)    | 70 (76.9)                            | 23 (88.5)                                   | 0.274         | 50 (74.6)                           | 43 (86.0)                                   | 0.167         |
| <b>Terminal</b>                                           | 27<br>(23.1)    | 13 (14.3)                            | 14 (53.8)                                   | <b>0.0001</b> | 6 (9.0)                             | 21 (42)                                     | <b>0.0001</b> |
| <b>Presence of lung involvement</b>                       | 63<br>(53.8)    | 46 (50.5)                            | 17 (65.4)                                   | 0.265         | 38 (56.7)                           | 25 (50.0)                                   | 0.574         |
| <b>Recent chemotherapy (previous month)</b>               | 81<br>(69.8)    | 60 (66.7)                            | 21 (80.8)                                   | 0.227         | 49 (73.1)                           | 32 (65.3)                                   | 0.416         |
| <b>Therapy (cytostatics vs other)</b>                     | 74<br>(63.2)    | 57 (62.6)                            | 17 (65.4)                                   | 0.068         | 44 (65.7)                           | 30 (60.0)                                   | 0.175         |
| <b>Clinical characteristics</b>                           |                 |                                      |                                             |               |                                     |                                             |               |
| <b>Sex (men)</b>                                          | 34<br>(29.1)    | 24 (26.4)                            | 10 (38.5)                                   | 0.233         | 16 (23.9)                           | 18 (36.0)                                   | 0.217         |
| <b>Age, mean (SD)</b>                                     | 65.6<br>(13.1)  | 66.0<br>(13.7)                       | 63.9<br>(10.8)                              | 0.462         | 67.4<br>(13.3)                      | 63.1<br>(12.6)                              | 0.084         |
| <b>Age-adjusted Charlson (mean, SD)</b>                   | 8.47<br>(2.3)   | 8.5 (2.5)                            | 8.5 (1.7)                                   | 0.983         | 8.4 (2.4)                           | 8.5 (2.2)                                   | 0.842         |
| <b>PS status (0-1)</b>                                    | 60<br>(53.6)    | 47 (54.7)                            | 13 (50.0)                                   | 0.823         | 39 (60.9)                           | 21 (43.8)                                   | 0.086         |
| <b>Place of acquisition (hospital vs other)</b>           | 37<br>(31.6)    | 27 (29.7)                            | 10 (38.5)                                   | 0.474         | 15 (22.4)                           | 22 (44.0)                                   | <b>0.016</b>  |
| <b>Vaccinated against influenza</b>                       | 50<br>(43.1)    | 42 (46.2)                            | 8 (32.0)                                    | 0.257         | 33 (49.3)                           | 17 (34.7)                                   | 0.133         |
| <b>Vaccinated against <i>Streptococcus pneumoniae</i></b> | 45<br>(39.1)    | 39 (42.9)                            | 6 (25)                                      | 0.158         | 31 (46.3)                           | 14 (29.2)                                   | 0.082         |

|                                                         |                |                |                |              |                |                |              |
|---------------------------------------------------------|----------------|----------------|----------------|--------------|----------------|----------------|--------------|
| <b>Hypoxemia at presentation</b>                        | 64<br>(54.7)   | 44 (48.4)      | 20 (76.9)      | <b>0.013</b> | 31 (46.3)      | 33 (66.0)      | <b>0.040</b> |
| <b>Fever at presentation</b>                            | 69<br>(59.0)   | 57 (62.6)      | 12 (46.2)      | 0.175        | 41 (61.2)      | 28 (56.0)      | 0.706        |
| <b>BP, mean (SD)</b>                                    | 90.9<br>(17.4) | 91.5<br>(17.4) | 88.7<br>(17.7) | 0.523        | 93.2<br>(17.2) | 87.4<br>(17.5) | 0.127        |
| <b>Creatinine, mean (SD)</b>                            | 0.8<br>(0.50)  | 0.9 (0.5)      | 0.8 (0.4)      | 0.344        | 0.9 (0.6)      | 0.8 (0.4)      | 0.151        |
| <b>Bilirubin, mean (SD)</b>                             | 0.7<br>(0.83)  | 0.7 (0.8)      | 0.9 (0.8)      | 0.263        | 0.6 (0.9)      | 0.8 (0.7)      | 0.420        |
| <b>Neutropenia &lt;1000</b>                             | 12<br>(10.3)   | 9 (9.9)        | 3 (11.5)       | 0.727        | 7 (10.4)       | 5 (10)         | 0.999        |
| <b>Neutropenia&lt;500</b>                               | 8<br>(6.8)     | 5 (5.5)        | 3 (11.5)       | 0.374        | 4 (6)          | 4 (8)          | 0.722        |
| <b>Corticosteroids</b>                                  | 34<br>(29.1)   | 24 (26.4)      | 10 (38.5)      | 0.233        | 13 (19.4)      | 21 (42.0)      | <b>0.013</b> |
| <b>Influenza</b>                                        | 5<br>(12.2)    | 3 (8.8)        | 2 (28.6)       | 0.196        | 3 (12.0)       | 2 (12.5)       | 0.999        |
| <b>Radiology</b>                                        |                |                |                |              |                |                |              |
| <b>Interstitial infiltrate</b>                          | 11<br>(9.4)    | 10 (11.0)      | 1 (3.8)        | 0.452        | 6 (9.0)        | 5 (10.0=)      | 0.999        |
| <b>Lobar infiltrate</b>                                 | 97<br>(90.7)   | 73 (88.0)      | 24 (10.0)      | 0.112        | 53 (88.3)      | 44 (93.6)      | 0.507        |
| <b>Pleural effusion</b>                                 | 38<br>(58.5)   | 28 (56.0)      | 10 (66.7)      | 0.558        | 19 (59.4)      | 19 (57.6)      | 0.999        |
| <b>Nodules</b>                                          | 7<br>(14.3)    | 5 (13.2)       | 2 (18.2)       | 0.646        | 5 (21.7)       | 2 (7.7)        | 0.230        |
| <b>Obstructive pneumonia</b>                            | 7<br>(6.0)     | 7 (7.7)        | 0 (0.0)        | 0.346        | 5 (7.5)        | 2 (4.0)        | 0.697        |
| <b>Diagnosis</b>                                        |                |                |                |              |                |                |              |
| <b>Bronchoscopy</b>                                     | 6<br>(5.1)     | 5 (5.5)        | 1 (3.8)        | 0.999        | 4 (6.0)        | 2 (4.0)        | 0.999        |
| <b>Etiological diagnosis</b>                            | 41<br>(35)     | 34 (37.4)      | 7 (26.9)       | 0.362        | 25 (37.3)      | 16 (32.0)      | 0.565        |
| <b>Management and outcome</b>                           |                |                |                |              |                |                |              |
| <b>Antimicrobial PDD, mean (SD)</b>                     | 18.9<br>(49.8) | 22 (55.9)      | 8.1 (9.6)      | 0.210        | 22.7<br>(64.8) | 13.8<br>(12.5) | 0.343        |
| <b>Appropriate empirical antimicrobials<sup>a</sup></b> | 29<br>(76.3)   | 25 (78.1)      | 4 (66.7)       | 0.613        | 16 (72.7)      | 13 (81.3)      | 0.706        |

|                         |              |           |          |               |           |           |               |
|-------------------------|--------------|-----------|----------|---------------|-----------|-----------|---------------|
| <b>ID consultation</b>  | 28<br>(23.9) | 20 (22.0) | 8 (30.8) | 0.435         | 12 (17.9) | 16 (32.0) | 0.085         |
| <b>Vasoactive drugs</b> | 5<br>(4.3)   | 2 (2.2)   | 3 (11.5) | 0.072         | 2 (3.0)   | 3 (6.0)   | 0.650         |
| <b>ICU admission</b>    | 15<br>(12.8) | 6 (6.6)   | 9 (34.6) | <b>0.001</b>  | 3 (4.5)   | 12 (24.0) | <b>0.004</b>  |
| <b>MV</b>               | 3<br>(2.6)   | 1 (1.1)   | 2 (7.7)  | 0.124         | 0 (0.0)   | 3 (6.0)   | 0.075         |
| <b>NIMV</b>             | 11<br>(9.4)  | 3 (3.3)   | 8 (30.8) | <b>0.0001</b> | 0 (0.0)   | 11 (22.0) | <b>0.0001</b> |
